# Supplementary material for: MALAT1-KTN1-EGFR regulatory axis promotes the development of cutaneous squamous cell carcinoma
Source: PubMed Central journal article supplement (PMC6748142; doi:10.1038/s41418-019-0288-7), 2019-01-25
Supplement: 41418_2019_288_MOESM4_ESM.pdf [file 41418_2019_288_MOESM4_ESM.pdf]

**Supporting Information Table 3: Functional annotation chart of down-regulated genes in MALAT1 depletion cells**

| Category        | Term                                                       | Count | %        | PValue   | Genes                                                                       | List Total | Pop Hits | Pop Total | Fold Enrich | Bonferroni | Benjamini | FDR      |
|-----------------|------------------------------------------------------------|-------|----------|----------|-----------------------------------------------------------------------------|------------|----------|-----------|-------------|------------|-----------|----------|
| GOTERM_CC_FAT   | GO:0012505~endomembrane system                             | 6     | 3.896104 | 2.87E-04 | HSP90B1, CENPF, KTN1, TPR, B2M, GOLGB1                                      | 12         | 782      | 12782     | 8.172634    | 0.032162   | 0.032162  | 0.32559  |
| SP_PIR_KEYWORDS | coiled coil                                                | 7     | 4.545455 | 3.84E-04 | CENPF, KTN1, TPR, DST, ASPM, SMC4, GOLGB1                                   | 12         | 2019     | 19235     | 5.557413    | 0.030287   | 0.030287  | 0.407867 |
| SP_PIR_KEYWORDS | phosphoprotein                                             | 11    | 7.142857 | 4.24E-04 | HSP90B1, HNRNPA2B1, CENPF, KTN1, TPR, ITGB1, DST, TOP2A, ASPM, SMC4, GOLGB1 | 12         | 7263     | 19235     | 2.427658    | 0.033371   | 0.016827  | 0.450021 |
| GOTERM_BP_FAT   | GO:0022402~cell cycle process                              | 5     | 3.246753 | 7.86E-04 | CENPF, ITGB1, DST, ASPM, SMC4                                               | 12         | 565      | 13528     | 9.976401    | 0.217446   | 0.217446  | 1.05088  |
| GOTERM_BP_FAT   | GO:0007059~chromosome segregation                          | 3     | 1.948052 | 0.001881 | CENPF, TOP2A, SMC4                                                          | 12         | 81       | 13528     | 41.75309    | 0.444162   | 0.254454  | 2.498616 |
| GOTERM_BP_FAT   | GO:0007049~cell cycle                                      | 5     | 3.246753 | 0.002562 | CENPF, ITGB1, DST, ASPM, SMC4                                               | 12         | 776      | 13528     | 7.263746    | 0.550866   | 0.234183  | 3.389983 |
| GOTERM_BP_FAT   | GO:0000278~mitotic cell cycle                              | 4     | 2.597403 | 0.002844 | CENPF, ITGB1, ASPM, SMC4                                                    | 12         | 370      | 13528     | 12.18739    | 0.588705   | 0.199173  | 3.755632 |
| GOTERM_MF_FAT   | GO:0008022~protein C-terminus binding                      | 3     | 1.948052 | 0.003142 | CENPF, DST, TOP2A                                                           | 9          | 141      | 12983     | 30.69267    | 0.164192   | 0.164192  | 3.070845 |
| GOTERM_MF_FAT   | GO:0046983~protein dimerization activity                   | 4     | 2.597403 | 0.003462 | CENPF, ITGB1, TOP2A, SMC4                                                   | 9          | 542      | 12983     | 10.64617    | 0.17937    | 0.094114  | 3.379263 |
| GOTERM_BP_FAT   | GO:0022403~cell cycle phase                                | 4     | 2.597403 | 0.003909 | CENPF, ITGB1, ASPM, SMC4                                                    | 12         | 414      | 13528     | 10.89211    | 0.705351   | 0.216821  | 5.128809 |
| SP_PIR_KEYWORDS | mitosis                                                    | 3     | 1.948052 | 0.004679 | CENPF, ASPM, SMC4                                                           | 12         | 183      | 19235     | 26.27732    | 0.312874   | 0.117573  | 4.864225 |
| GOTERM_CC_FAT   | GO:0005694~chromosome                                      | 4     | 2.597403 | 0.006157 | CENPF, TPR, TOP2A, SMC4                                                     | 12         | 460      | 12782     | 9.262319    | 0.50543    | 0.296743  | 6.782779 |
| GOTERM_MF_FAT   | GO:0046982~protein heterodimerization activity             | 3     | 1.948052 | 0.006712 | ITGB1, TOP2A, SMC4                                                          | 9          | 208      | 12983     | 20.80609    | 0.318781   | 0.120109  | 6.457532 |
| GOTERM_BP_FAT   | GO:0045841~negative regulation of mitotic metaphase/anaph  | 2     | 1.298701 | 0.008911 | CENPF, TPR                                                                  | 12         | 11       | 13528     | 204.9697    | 0.938752   | 0.372161  | 11.33743 |
| GOTERM_BP_FAT   | GO:0007094~mitotic cell cycle spindle assembly checkpoint  | 2     | 1.298701 | 0.008911 | CENPF, TPR                                                                  | 12         | 11       | 13528     | 204.9697    | 0.938752   | 0.372161  | 11.33743 |
| SP_PIR_KEYWORDS | cell division                                              | 3     | 1.948052 | 0.009512 | CENPF, ASPM, SMC4                                                           | 12         | 264      | 19235     | 18.21496    | 0.534472   | 0.173988  | 9.661375 |
| GOTERM_BP_FAT   | GO:0031577~spindle checkpoint                              | 2     | 1.298701 | 0.009718 | CENPF, TPR                                                                  | 12         | 12       | 13528     | 187.8889    | 0.952491   | 0.352905  | 12.30248 |
| GOTERM_BP_FAT   | GO:0051784~negative regulation of nuclear division         | 2     | 1.298701 | 0.009718 | CENPF, TPR                                                                  | 12         | 12       | 13528     | 187.8889    | 0.952491   | 0.352905  | 12.30248 |
| GOTERM_BP_FAT   | GO:0045839~negative regulation of mitosis                  | 2     | 1.298701 | 0.009718 | CENPF, TPR                                                                  | 12         | 12       | 13528     | 187.8889    | 0.952491   | 0.352905  | 12.30248 |
| GOTERM_CC_FAT   | GO:0015630~microtubule cytoskeleton                        | 4     | 2.597403 | 0.010043 | CENPF, DST, TOP2A, ASPM                                                     | 12         | 549      | 12782     | 7.760777    | 0.683569   | 0.318562  | 10.84456 |
| SP_PIR_KEYWORDS | acetylation                                                | 6     | 3.896104 | 0.010827 | HNRNPA2B1, CENPF, TPR, ITGB1, TOP2A, SMC4                                   | 12         | 2635     | 19235     | 3.649905    | 0.581405   | 0.159846  | 10.92817 |
| KEGG_PATHWAY    | hsa05200:Pathways in cancer                                | 3     | 1.948052 | 0.011914 | HSP90B1, TPR, ITGB1                                                         | 4          | 328      | 5085      | 11.62729    | 0.174506   | 0.174506  | 8.15939  |
| GOTERM_CC_FAT   | GO:0043232~intracellular non-membrane-bounded organelle    | 7     | 4.545455 | 0.012545 | HNRNPA2B1, CENPF, TPR, DST, TOP2A, ASPM, SMC4                               | 12         | 2596     | 12782     | 2.872175    | 0.762889   | 0.302189  | 13.37462 |
| GOTERM_CC_FAT   | GO:0043228~non-membrane-bounded organelle                  | 7     | 4.545455 | 0.012545 | HNRNPA2B1, CENPF, TPR, DST, TOP2A, ASPM, SMC4                               | 12         | 2596     | 12782     | 2.872175    | 0.762889   | 0.302189  | 13.37462 |
| GOTERM_BP_FAT   | GO:0033043~regulation of organelle organization            | 3     | 1.948052 | 0.012806 | CENPF, TPR, DST                                                             | 12         | 217      | 13528     | 15.58525    | 0.98207    | 0.395083  | 15.90837 |
| GOTERM_BP_FAT   | GO:0007067~mitosis                                         | 3     | 1.948052 | 0.013146 | CENPF, ASPM, SMC4                                                           | 12         | 220      | 13528     | 15.37273    | 0.983897   | 0.367926  | 16.29671 |
| GOTERM_BP_FAT   | GO:0000280~nuclear division                                | 3     | 1.948052 | 0.013146 | CENPF, ASPM, SMC4                                                           | 12         | 220      | 13528     | 15.37273    | 0.983897   | 0.367926  | 16.29671 |
| GOTERM_BP_FAT   | GO:0000087~M phase of mitotic cell cycle                   | 3     | 1.948052 | 0.013605 | CENPF, ASPM, SMC4                                                           | 12         | 224      | 13528     | 15.09821    | 0.986074   | 0.347797  | 16.81893 |
| GOTERM_BP_FAT   | GO:0048285~organelle fission                               | 3     | 1.948052 | 0.014189 | CENPF, ASPM, SMC4                                                           | 12         | 229      | 13528     | 14.76856    | 0.988424   | 0.333252  | 17.47858 |
| UP_SEQ_FEATURE  | domain:CH 2                                                | 2     | 1.298701 | 0.015434 | DST, ASPM                                                                   | 12         | 27       | 19113     | 117.9815    | 0.908859   | 0.908859  | 17.02149 |
| UP_SEQ_FEATURE  | domain:CH 1                                                | 2     | 1.298701 | 0.015434 | DST, ASPM                                                                   | 12         | 27       | 19113     | 117.9815    | 0.908859   | 0.908859  | 17.02149 |
| INTERPRO        | IPR003594:ATP-binding region, ATPase-like                  | 2     | 1.298701 | 0.016095 | HSP90B1, TOP2A                                                              | 10         | 30       | 16659     | 111.06      | 0.56287    | 0.56287   | 14.52698 |
| GOTERM_BP_FAT   | GO:0030071~regulation of mitotic metaphase/anaphase trans  | 2     | 1.298701 | 0.017751 | CENPF, TPR                                                                  | 12         | 22       | 13528     | 102.4848    | 0.996257   | 0.37228   | 21.3972  |
| SMART           | SM00387:HATPase_c                                          | 2     | 1.298701 | 0.019668 | HSP90B1, TOP2A                                                              | 7          | 30       | 9079      | 86.46667    | 0.242779   | 0.242779  | 12.62283 |
| GOTERM_BP_FAT   | GO:0030261~chromosome condensation                         | 2     | 1.298701 | 0.020149 | TOP2A, SMC4                                                                 | 12         | 25       | 13528     | 90.18667    | 0.998254   | 0.38646   | 23.93824 |
| GOTERM_BP_FAT   | GO:0010948~negative regulation of cell cycle process       | 2     | 1.298701 | 0.020149 | CENPF, TPR                                                                  | 12         | 25       | 13528     | 90.18667    | 0.998254   | 0.38646   | 23.93824 |
| GOTERM_BP_FAT   | GO:0051301~cell division                                   | 3     | 1.948052 | 0.02289  | CENPF, ASPM, SMC4                                                           | 12         | 295      | 13528     | 11.46441    | 0.999272   | 0.403128  | 26.74967 |
| BIOCARTA        | h_nkcellsPathway:Ras-Independent pathway in NK cell-mediat | 2     | 1.298701 | 0.026278 | ITGB1, B2M                                                                  | 3          | 19       | 1437      | 50.42105    | 0.428347   | 0.428347  | 18.58555 |
| SP_PIR_KEYWORDS | cell cycle                                                 | 3     | 1.948052 | 0.02732  | CENPF, ASPM, SMC4                                                           | 12         | 461      | 19235     | 10.43113    | 0.890955   | 0.308804  | 25.50829 |
| GOTERM_BP_FAT   | GO:0000279~M phase                                         | 3     | 1.948052 | 0.028055 | CENPF, ASPM, SMC4                                                           | 12         | 329      | 13528     | 10.27964    | 0.999861   | 0.446711  | 31.78636 |
| GOTERM_BP_FAT   | GO:0051726~regulation of cell cycle                        | 3     | 1.948052 | 0.028372 | CENPF, TPR, ITGB1                                                           | 12         | 331      | 13528     | 10.21752    | 0.999874   | 0.429507  | 32.08528 |
| SP_PIR_KEYWORDS | cytoplasm                                                  | 6     | 3.896104 | 0.028602 | HNRNPA2B1, CENPF, DST, TOP2A, ASPM, SMC4                                    | 12         | 3332     | 19235     | 2.886405    | 0.901874   | 0.282257  | 26.54546 |
| GOTERM_CC_FAT   | GO:0000922~spindle pole                                    | 2     | 1.298701 | 0.028885 | CENPF, ASPM                                                                 | 12         | 34       | 12782     | 62.65686    | 0.964612   | 0.487409  | 28.34707 |
| GOTERM_BP_FAT   | GO:0007093~mitotic cell cycle checkpoint                   | 2     | 1.298701 | 0.034427 | CENPF, TPR                                                                  | 12         | 43       | 13528     | 52.43411    | 0.999982   | 0.474267  | 37.55901 |
| GOTERM_MF_FAT   | GO:0000166~nucleotide binding                              | 5     | 3.246753 | 0.034681 | HSP90B1, HNRNPA2B1, TPR, TOP2A, SMC4                                        | 9          | 2245     | 12983     | 3.212819    | 0.866265   | 0.39527   | 29.52167 |
| GOTERM_MF_FAT   | GO:0005178~integrin binding                                | 2     | 1.298701 | 0.035792 | ITGB1, DST                                                                  | 9          | 59       | 12983     | 48.90019    | 0.874761   | 0.339994  | 30.32157 |
| INTERPRO        | IPR001715:Calponin-like actin-binding                      | 2     | 1.298701 | 0.037197 | DST, ASPM                                                                   | 10         | 70       | 16659     | 47.59714    | 0.855318   | 0.619629  | 30.69847 |
| GOTERM_CC_FAT   | GO:0044427~chromosomal part                                | 3     | 1.948052 | 0.041779 | CENPF, TPR, SMC4                                                            | 12         | 386      | 12782     | 8.278497    | 0.99229    | 0.555528  | 38.45205 |
| GOTERM_BP_FAT   | GO:0051783~regulation of nuclear division                  | 2     | 1.298701 | 0.04462  | CENPF, TPR                                                                  | 12         | 56       | 13528     | 40.2619     | 0.999999   | 0.546703  | 45.86145 |
| GOTERM_BP_FAT   | GO:0007088~regulation of mitosis                           | 2     | 1.298701 | 0.04462  | CENPF, TPR                                                                  | 12         | 56       | 13528     | 40.2619     | 0.999999   | 0.546703  | 45.86145 |
| SMART           | SM00033:CH                                                 | 2     | 1.298701 | 0.04539  | DST, ASPM                                                                   | 7          | 70       | 9079      | 37.05714    | 0.478131   | 0.277595  | 27.06116 |
| GOTERM_BP_FAT   | GO:0051235~maintenance of location                         | 2     | 1.298701 | 0.050845 | HSP90B1, ASPM                                                               | 12         | 64       | 13528     | 35.22917    | 1          | 0.575524  | 50.41552 |
| GOTERM_MF_FAT   | GO:0005524~ATP binding                                     | 4     | 2.597403 | 0.053047 | HSP90B1, TPR, TOP2A, SMC4                                                   | 9          | 1477     | 12983     | 3.906718    | 0.955257   | 0.404171  | 41.74087 |
| GOTERM_MF_FAT   | GO:0032559~adenyl ribonucleotide binding                   | 4     | 2.597403 | 0.054894 | HSP90B1, TPR, TOP2A, SMC4                                                   | 9          | 1497     | 12983     | 3.854524    | 0.95997    | 0.368547  | 42.85775 |
| GOTERM_CC_FAT   | GO:0070013~intracellular organelle lumen                   | 5     | 3.246753 | 0.054897 | HSP90B1, HNRNPA2B1, CENPF, TPR, TOP2A                                       | 12         | 1779     | 12782     | 2.993723    | 0.998398   | 0.601289  | 47.38231 |
| GOTERM_BP_FAT   | GO:0007229~integrin-mediated signaling pathway             | 2     | 1.298701 | 0.055489 | ITGB1, DST                                                                  | 12         | 70       | 13528     | 32.20952    | 1          | 0.589579  | 53.57946 |
| GOTERM_MF_FAT   | GO:0042802~identical protein binding                       | 3     | 1.948052 | 0.05575  | CENPF, ITGB1, TOP2A                                                         | 9          | 640      | 12983     | 6.761979    | 0.961984   | 0.335498  | 43.36839 |
| GOTERM_BP_FAT   | GO:0051276~chromosome organization                         | 3     | 1.948052 | 0.05695  | CENPF, TOP2A, SMC4                                                          | 12         | 485      | 13528     | 6.973196    | 1          | 0.581536  | 54.53557 |
| SP_PIR_KEYWORDS | heterodimer                                                | 2     | 1.298701 | 0.057366 | ITGB1, B2M                                                                  | 12         | 103      | 19235     | 31.1246     | 0.991139   | 0.446098  | 46.63709 |
| GOTERM_CC_FAT   | GO:0043233~organelle lumen                                 | 5     | 3.246753 | 0.05898  | HSP90B1, HNRNPA2B1, CENPF, TPR, TOP2A                                       | 12         | 1820     | 12782     | 2.926282    | 0.999022   | 0.579483  | 49.91019 |
| GOTERM_CC_FAT   | GO:0031090~organelle membrane                              | 4     | 2.597403 | 0.061597 | HSP90B1, KTN1, B2M, GOLGB1                                                  | 12         | 1096     | 12782     | 3.88747     | 0.999288   | 0.55304   | 51.4715  |
| GOTERM_MF_FAT   | GO:0030554~adenyl nucleotide binding                       | 4     | 2.597403 | 0.062619 | HSP90B1, TPR, TOP2A, SMC4                                                   | 9          | 1577     | 12983     | 3.658987    | 0.974926   | 0.33605   | 47.32231 |
| GOTERM_CC_FAT   | GO:0031974~membrane-enclosed lumen                         | 5     | 3.246753 | 0.062707 | HSP90B1, HNRNPA2B1, CENPF, TPR, TOP2A                                       | 12         | 1856     | 12782     | 2.869522    | 0.999378   | 0.522055  | 52.12075 |

|                 |                                                                |   |          |          |                                          |    |      |       |          |          |          |          |
|-----------------|----------------------------------------------------------------|---|----------|----------|------------------------------------------|----|------|-------|----------|----------|----------|----------|
| GOTERM_BP_FAT   | GO:0045786~negative regulation of cell cycle                   | 2 | 1.298701 | 0.06395  | CENPF, TPR                               | 12 | 81   | 13528 | 27.83539 | 1        | 0.608284 | 58.86813 |
| GOTERM_CC_FAT   | GO:0000776~kinetochore                                         | 2 | 1.298701 | 0.064329 | CENPF, TPR                               | 12 | 77   | 12782 | 27.66667 | 0.999489 | 0.497969 | 53.05457 |
| GOTERM_BP_FAT   | GO:0010639~negative regulation of organelle organization       | 2 | 1.298701 | 0.064715 | CENPF, TPR                               | 12 | 82   | 13528 | 27.49593 | 1        | 0.596497 | 59.31815 |
| GOTERM_MF_FAT   | GO:0001883~purine nucleoside binding                           | 4 | 2.597403 | 0.06504  | HSP90B1, TPR, TOP2A, SMC4                | 9  | 1601 | 12983 | 3.604136 | 0.978363 | 0.318416 | 48.65567 |
| GOTERM_MF_FAT   | GO:0001882~nucleoside binding                                  | 4 | 2.597403 | 0.066166 | HSP90B1, TPR, TOP2A, SMC4                | 9  | 1612 | 12983 | 3.579542 | 0.979799 | 0.298638 | 49.26516 |
| GOTERM_BP_FAT   | GO:0000075~cell cycle checkpoint                               | 2 | 1.298701 | 0.071581 | CENPF, TPR                               | 12 | 91   | 13528 | 24.77656 | 1        | 0.619222 | 63.15446 |
| GOTERM_BP_FAT   | GO:0051640~organelle localization                              | 2 | 1.298701 | 0.072341 | CENPF, ASPM                              | 12 | 92   | 13528 | 24.50725 | 1        | 0.608253 | 63.55788 |
| GOTERM_CC_FAT   | GO:0042470~melanosome                                          | 2 | 1.298701 | 0.074008 | HSP90B1, ITGB1                           | 12 | 89   | 12782 | 23.93633 | 0.999844 | 0.518311 | 58.29061 |
| GOTERM_CC_FAT   | GO:0048770~pigment granule                                     | 2 | 1.298701 | 0.074008 | HSP90B1, ITGB1                           | 12 | 89   | 12782 | 23.93633 | 0.999844 | 0.518311 | 58.29061 |
| SP_PIR_KEYWORDS | nucleus                                                        | 6 | 3.896104 | 0.0755   | HNRNPA2B1, CENPF, TPR, TOP2A, ASPM, SMC4 | 12 | 4283 | 19235 | 2.245505 | 0.998127 | 0.50232  | 56.59395 |
| GOTERM_BP_FAT   | GO:0050658~RNA transport                                       | 2 | 1.298701 | 0.076133 | HNRNPA2B1, TPR                           | 12 | 97   | 13528 | 23.24399 | 1        | 0.613353 | 65.51011 |
| GOTERM_BP_FAT   | GO:0050657~nucleic acid transport                              | 2 | 1.298701 | 0.076133 | HNRNPA2B1, TPR                           | 12 | 97   | 13528 | 23.24399 | 1        | 0.613353 | 65.51011 |
| GOTERM_BP_FAT   | GO:0051236~establishment of RNA localization                   | 2 | 1.298701 | 0.076133 | HNRNPA2B1, TPR                           | 12 | 97   | 13528 | 23.24399 | 1        | 0.613353 | 65.51011 |
| GOTERM_BP_FAT   | GO:0006403~RNA localization                                    | 2 | 1.298701 | 0.078401 | HNRNPA2B1, TPR                           | 12 | 100  | 13528 | 22.54667 | 1        | 0.610719 | 66.63121 |
| GOTERM_CC_FAT   | GO:0016023~cytoplasmic membrane-bounded vesicle                | 3 | 1.948052 | 0.078607 | HSP90B1, ITGB1, DST                      | 12 | 550  | 12782 | 5.81     | 0.999912 | 0.512236 | 60.58643 |
| GOTERM_BP_FAT   | GO:0051329~interphase of mitotic cell cycle                    | 2 | 1.298701 | 0.080664 | CENPF, ITGB1                             | 12 | 103  | 13528 | 21.88997 | 1        | 0.60826  | 67.71611 |
| GOTERM_BP_FAT   | GO:0051325~interphase                                          | 2 | 1.298701 | 0.082922 | CENPF, ITGB1                             | 12 | 106  | 13528 | 21.27044 | 1        | 0.605959 | 68.76597 |
| GOTERM_CC_FAT   | GO:0031988~membrane-bounded vesicle                            | 3 | 1.948052 | 0.083137 | HSP90B1, ITGB1, DST                      | 12 | 568  | 12782 | 5.62588  | 0.99995  | 0.506769 | 62.73494 |
| GOTERM_BP_FAT   | GO:0015931~nucleobase, nucleoside, nucleotide and nucleic acid | 2 | 1.298701 | 0.088172 | HNRNPA2B1, TPR                           | 12 | 113  | 13528 | 19.9528  | 1        | 0.617091 | 71.08561 |
| GOTERM_BP_FAT   | GO:0007018~microtubule-based movement                          | 2 | 1.298701 | 0.088172 | KTN1, DST                                | 12 | 113  | 13528 | 19.9528  | 1        | 0.617091 | 71.08561 |
| GOTERM_MF_FAT   | GO:0003682~chromatin binding                                   | 2 | 1.298701 | 0.088799 | CENPF, TOP2A                             | 9  | 150  | 12983 | 19.23407 | 0.995011 | 0.357065 | 60.21795 |
| GOTERM_BP_FAT   | GO:0010564~regulation of cell cycle process                    | 2 | 1.298701 | 0.088919 | CENPF, TPR                               | 12 | 114  | 13528 | 19.77778 | 1        | 0.608296 | 71.40271 |
| GOTERM_BP_FAT   | GO:0006323~DNA packaging                                       | 2 | 1.298701 | 0.091159 | TOP2A, SMC4                              | 12 | 117  | 13528 | 19.27066 | 1        | 0.606218 | 72.33343 |
| GOTERM_MF_FAT   | GO:0032555~purine ribonucleotide binding                       | 4 | 2.597403 | 0.091221 | HSP90B1, TPR, TOP2A, SMC4                | 9  | 1836 | 12983 | 3.142823 | 0.995713 | 0.342562 | 61.25392 |
| GOTERM_MF_FAT   | GO:0032553~ribonucleotide binding                              | 4 | 2.597403 | 0.091221 | HSP90B1, TPR, TOP2A, SMC4                | 9  | 1836 | 12983 | 3.142823 | 0.995713 | 0.342562 | 61.25392 |
| GOTERM_CC_FAT   | GO:0030055~cell-substrate junction                             | 2 | 1.298701 | 0.092306 | ITGB1, DST                               | 12 | 112  | 12782 | 19.02083 | 0.999984 | 0.520997 | 66.76017 |
